# Supplementary material
Source: publisher figshare collection journal article supplement (https://acs.figshare.com/ndownloader/files/3801103)
Supplement: Supplementary file 1 [file 3801103]

# Supporting Information for

## Graphene aerogels decorated with $\alpha$ -FeOOH nanoparticles for efficient adsorption of arsenic from contaminated waters

*Ivan Andjelkovic<sup>\*,†,a</sup>, Diana N.H. Tran<sup>a</sup>, Shervin Kabiri<sup>a</sup>, Sara Azari<sup>a</sup>, Marijana Markovic<sup>b</sup>, and Dusan Losic<sup>\*,a</sup>*

<sup>†</sup> Innovation center of the Faculty of Chemistry, University of Belgrade, Studentski Trg 12-16, Belgrade, Serbia

<sup>a</sup> School of Chemical Engineering, The University of Adelaide, Adelaide, SA 5005, Australia

<sup>b</sup> Institute of Chemistry, Technology and Metallurgy, Center of Chemistry, University of Belgrade, Njegoseva 12, Belgrade, Serbia

\*Corresponding author. [dusan.losic@adelaide.edu.au](mailto:dusan.losic@adelaide.edu.au)

### **Methylene blue (MB) adsorption method**

The test was conducted by first adding a known mass of the aerogel into a MB solution of standard concentration (200 ppm). The mixed suspension was then

sonicated for 2 h and stirred continuously for 24 h to reach the adsorption-desorption equilibrium of MB. Suspended materials were then removed by centrifuging the mixture. The MB concentration was consequently measured by analysing the supernatant through UV-Vis spectroscopy at a wavelength of 665 nm compared with the initial standard concentration. The SSA of the aerogel was then calculated using the following equation:

$$SSA = \frac{N_A A_{MB}}{M_{MB}} \frac{(C_0 - C_e)V}{m_S}$$

where  $N_A$  represents Avogadro number ( $6.02 \times 10^{23}/\text{mol}$ ),  $A_{MB}$  is the covered area of per MB molecules (typically assumed to be  $1.35 \text{ nm}^2$ ),  $C_0$  and  $C_e$  are the initial and equilibrium concentration of MB, respectively,  $V$  is the volume of MB solution,  $M_{MB}$ , is the relative molecular mass of MB, and  $m_S$  is the mass of the sample.

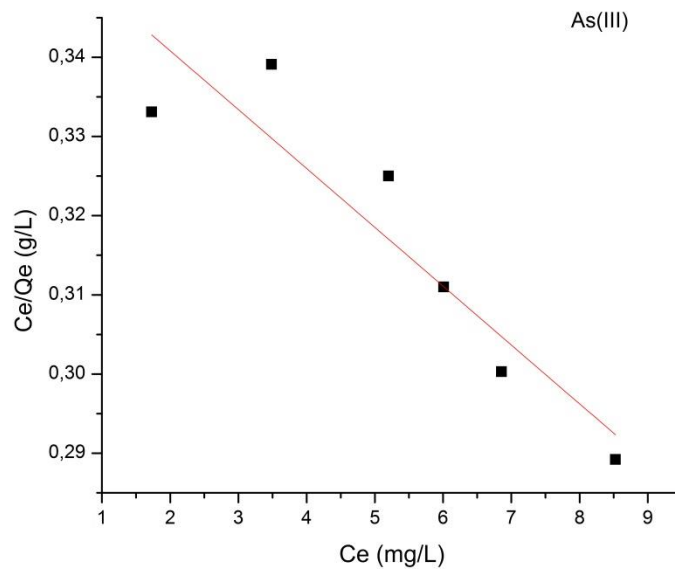

**Figure S1.** Langmuir plot for the sorption of As(III) on the graphene- $\alpha$ FeOOH aerogel.

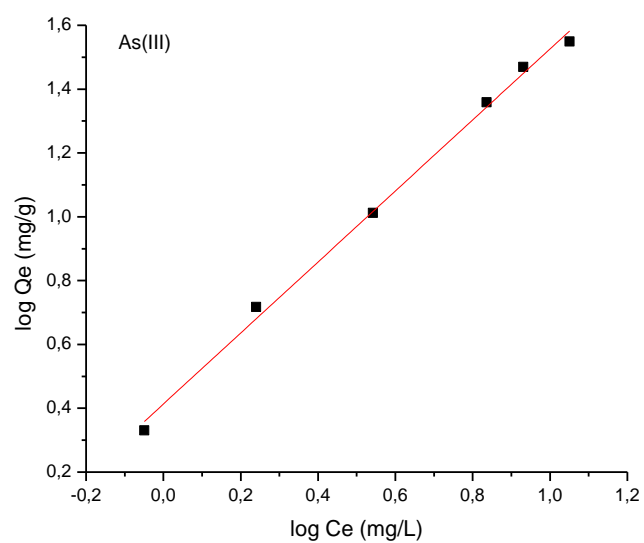

**Figure S2.** Freundlich plot for the sorption of As(III) on the graphene- $\alpha$ FeOOH aerogel.

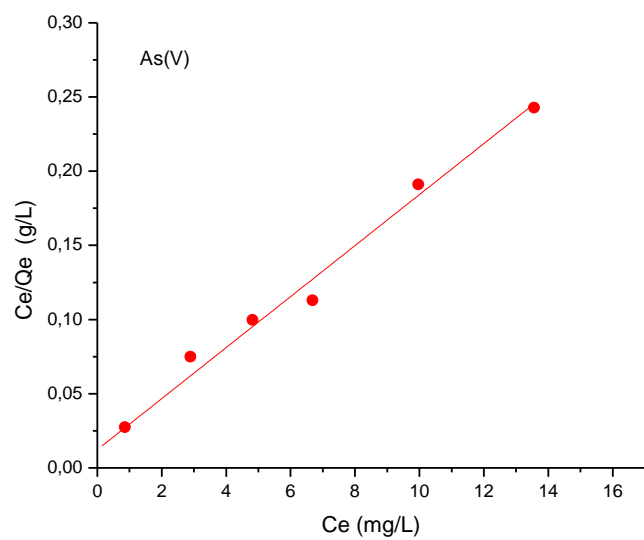

**Figure S3.** Langmuir plot for the sorption of As(V) on the graphene- $\alpha$ FeOOH aerogel.

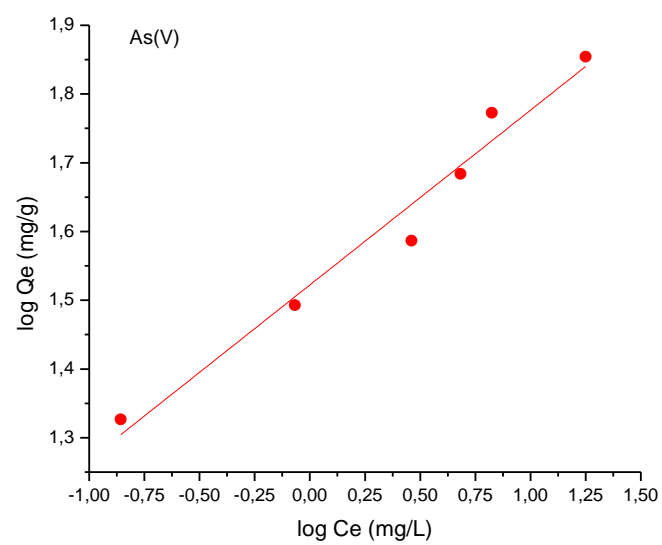

**Figure S4.** Freundlich plot for the sorption of As(V) on the graphene- $\alpha$ FeOOH aerogel.

**Table S1.** Chemical composition of the tap water in the city of Zrenjanin, Serbia (pH 8.0±0.2)

| Component                     | Concentration (mg/L) |
|-------------------------------|----------------------|
| Cl <sup>-</sup>               | 12.67±0.8            |
| F <sup>-</sup>                | < 0.05               |
| SO <sub>4</sub> <sup>2-</sup> | 48.32±1.4            |
| HCO <sub>3</sub> <sup>-</sup> | 122±2.3              |
| PO <sub>4</sub> <sup>3-</sup> | 1.2±0.1              |
| NO <sub>2</sub> <sup>-</sup>  | 0.087±0.009          |
| NO <sub>3</sub> <sup>-</sup>  | 36.73±2.8            |
| NH <sub>4</sub> <sup>+</sup>  | 0.25±0.4             |
| As                            | 0.150±0.05           |
| Ca                            | 20.1±1.1             |
| Mg                            | 11.0±0.6             |
| K                             | 2.5±0.2              |
| Na                            | 260±22               |
| Fe                            | 0.36±0.04            |
| Mn                            | 0.014±0.003          |
| Zn                            | 0.020±0.004          |
